# Supplementary material for: Terminal differentiation of T cells is strongly associated with CMV infection and increased in HIV-positive individuals on ART and lifestyle matched controls
Source: PubMed Central journal article supplement (PMC5555623; doi:10.1371/journal.pone.0183357), 2017-08-14
Supplement: pone.0183357.s001.pdf [file pone.0183357.s001.pdf]

# S1 Fig.

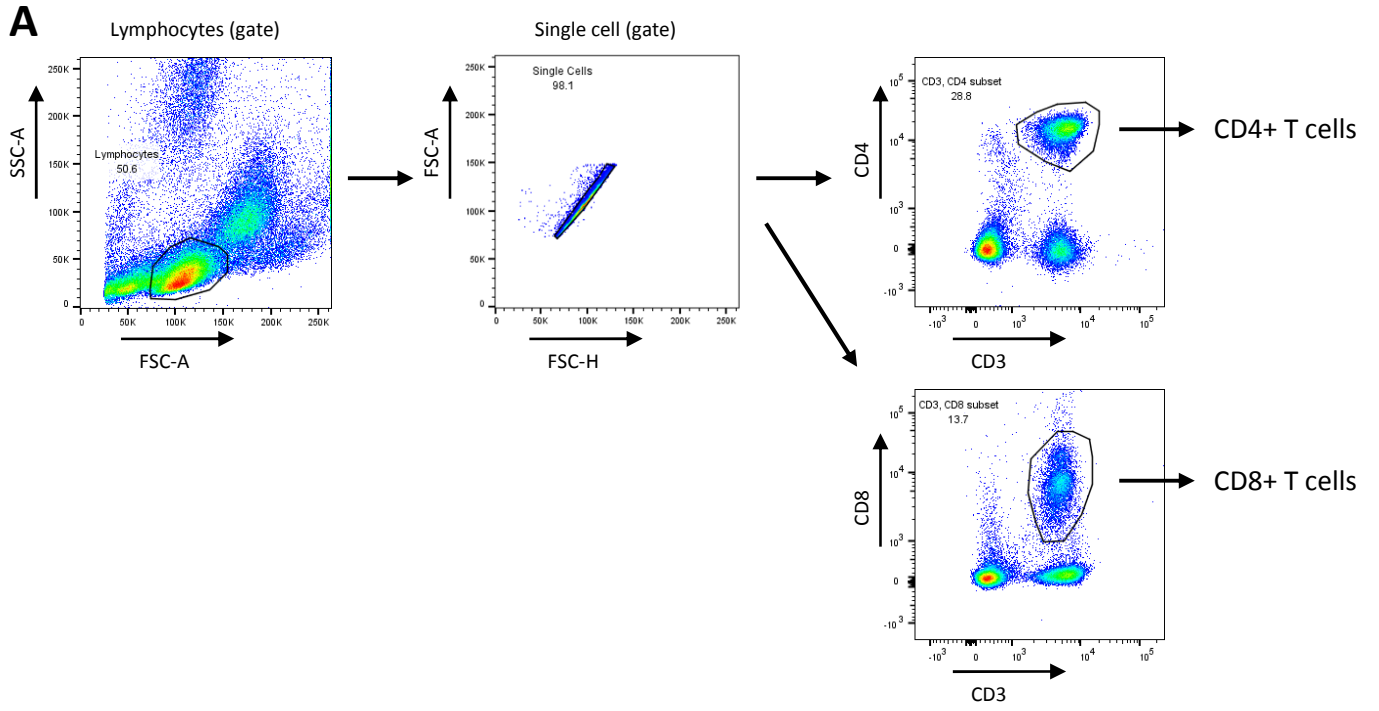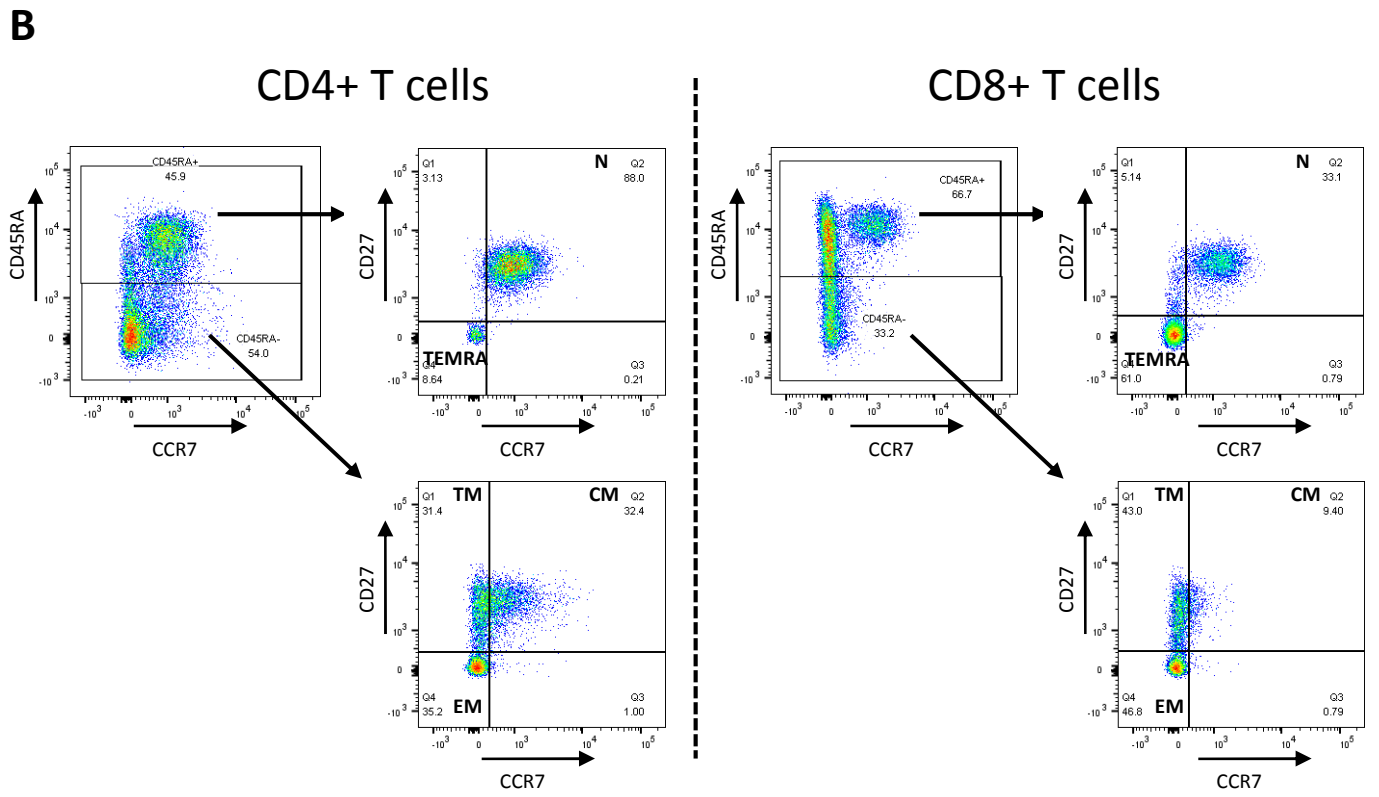

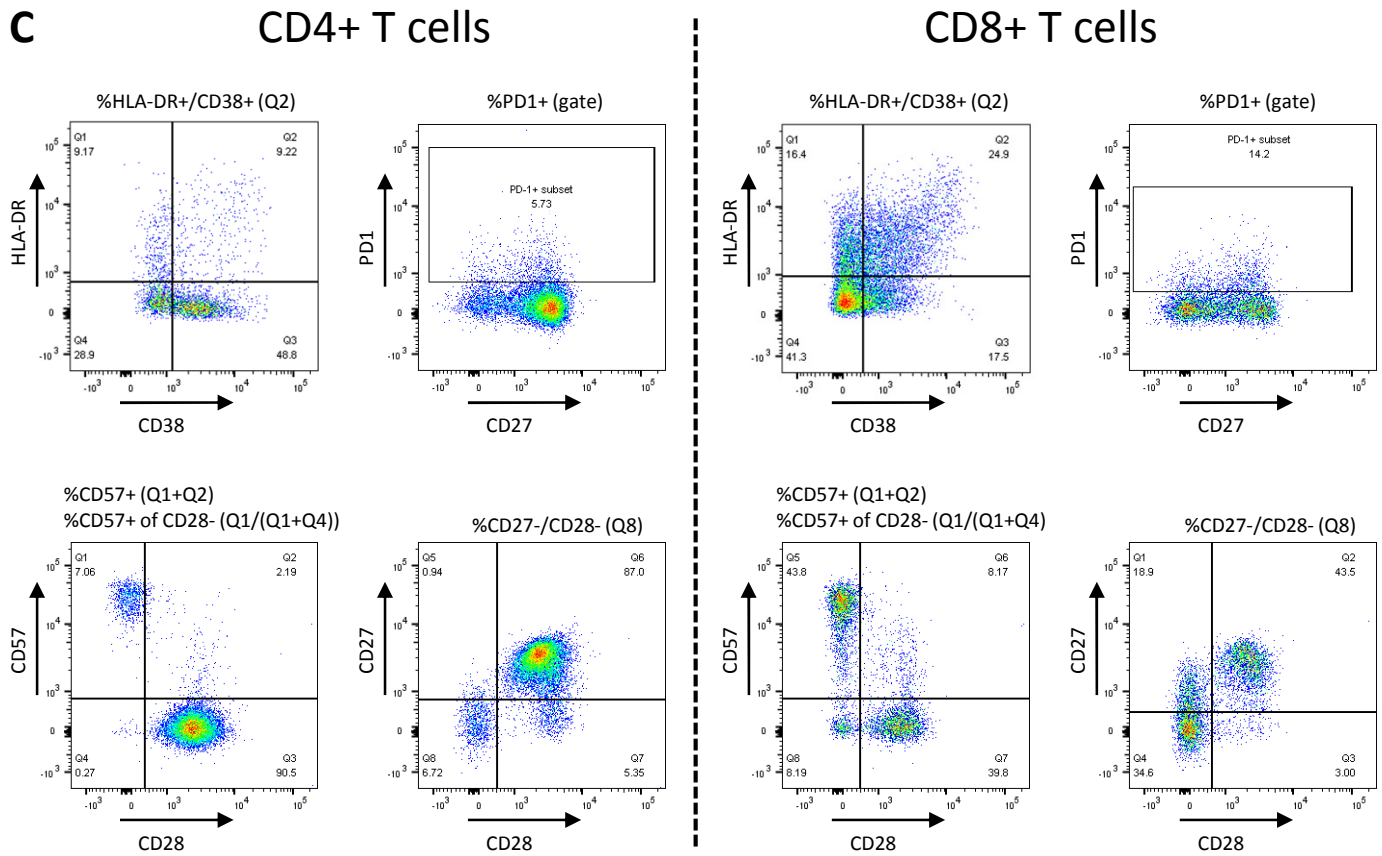

**S1 Fig. Gating strategy flow cytometry. A.** Gating of CD4+ and CD8+ T cells. **B.** T cell differentiation was defined as the proportion of naïve (N; CD45RA<sup>+</sup>CD27<sup>+</sup>CCR7<sup>+</sup>), central memory (CM; CD45RA<sup>-</sup>CCR7<sup>+</sup>CD27<sup>+</sup>), transitional memory (TM; CD45RA<sup>-</sup>CCR7<sup>-</sup>CD27<sup>+</sup>), effector memory (EM; CD45RA<sup>-</sup>CCR7<sup>-</sup>CD27<sup>-</sup>), and terminally differentiated effector memory (TEMRA; CD45RA<sup>+</sup>CCR7<sup>-</sup>CD27<sup>-</sup>) within the total CD4 or CD8 T cell population. **C.** T cell activation was defined as the proportion of cells that were positive for both CD38 and HLA-DR within the total CD4 or CD8 T cell population. T cell exhaustion was defined as the proportion of PD1 positive cells within the total CD4 or CD8 T cell population. Terminally differentiated T cells were defined as proportion of CD57 positive cells within the total CD4 or CD8 T cells population, the proportion of cells negative for both CD27 and CD28 within the total CD4 or CD8 T-cells population, or the proportion of CD57 positive within the CD28<sup>-</sup>CD4<sup>+</sup> or CD28<sup>-</sup>CD8<sup>+</sup> T cell population.
